# Supplementary material for: Structures and IR/UV spectra of neutral and ionic phenol–Arn cluster isomers (n≤ 4): competition between hydrogen bonding and stacking
Source: Royal Society of Chemistry journal article supplement (doi:10.1039/c1cp20676a), 2011-01-01
Supplement: c1cp20676a.pdf [file c1cp20676a.pdf]

## Supporting Information

### **Structures and IR/UV spectra of neutral and ionic phenol-Ar<sub>n</sub> cluster isomers (n≤4): competition between hydrogen bonding and stacking \*\***

Matthias Schmies,<sup>1</sup> Alexander Patzer,<sup>1</sup> Masaaki Fujii,<sup>2</sup> and Otto Dopfer<sup>1\*</sup>

<sup>1</sup> Institut für Optik und Atomare Physik, Technische Universität Berlin, 10623 Berlin, Germany

<sup>2</sup> Chemical Resources Laboratory, Tokyo Institute of Technology, Yokohama 226-8503, Japan

\* E-mail: dopfer@physik.tu-berlin.de

\*\* dedicated to Bernhard Brutschy on the occasion of this 65<sup>th</sup> birthday

**Table T1.** O-H stretch frequencies ( $\nu_{\text{OH}}$  in  $\text{cm}^{-1}$ ) of selected PhOH-Ar<sub>n</sub> isomers calculated at the M06-2X level compared to available experimental values.

| n | Exp <sup>a</sup> | M06-2X | isomer            |
|---|------------------|--------|-------------------|
| 0 | 3658             | 3658   | PhOH              |
| 1 |                  | 3648   | (H00)             |
|   | 3656             | 3656   | (10)              |
| 2 |                  | 3647   | (H10)             |
|   |                  | 3651   | (11) <sup>H</sup> |
|   | 3656             | 3654   | (11)              |
|   |                  | 3655   | (20)              |
| 3 |                  | 3649   | (H11)             |
|   | 3654             | 3652   | (30)              |
|   |                  | 3652   | (21)              |
|   |                  | 3653   | (H20)             |
|   |                  | 3651   | (21) <sup>H</sup> |
| 4 |                  | 3650   | (H30)             |
|   |                  | 3650   | (H21)             |
|   |                  | 3655   | (22)              |
|   |                  | 3653   | (40)              |
|   |                  | 3648   | (40) T            |
|   | 3653             | 3648   | (31)              |

<sup>a</sup> S. Ishiuchi et al., *Phys. Chem. Chem. Phys.*, 2011, **13**, 2409.

**Table T2.** Frequencies of intermolecular modes of (10) and (11) in the S<sub>0</sub> and S<sub>1</sub> states evaluated at the RI-CC2/aug-cc-pVDZ level. Harmonic frequencies are scaled by 0.752. Available experimental values in the S<sub>1</sub> state are given for comparison.

| (01)           | S <sub>0</sub> | S <sub>1</sub> | S <sub>1</sub> (exp) <sup>a</sup> | (11)            | S <sub>0</sub> | S <sub>1</sub> | S <sub>1</sub> (exp) <sup>b</sup> |
|----------------|----------------|----------------|-----------------------------------|-----------------|----------------|----------------|-----------------------------------|
| b <sub>x</sub> | 20             | 20             | 20                                | b <sub>xs</sub> | 13             | 13             | 14                                |
| b <sub>y</sub> | 35             | 37             |                                   | b <sub>ys</sub> | 18             | 20             | 20                                |
| s <sub>z</sub> | 41             | 45             | 45                                | b <sub>xa</sub> | 25             | 25             |                                   |
|                |                |                |                                   | s <sub>zs</sub> | 36             | 39             | 36                                |
|                |                |                |                                   | s <sub>za</sub> | 45             | 49             |                                   |
|                |                |                |                                   | b <sub>ya</sub> | 50             | 49             |                                   |

<sup>a</sup> M. Mons et al., *J. Chem. Phys.*, 1990, **92**, 2155.

<sup>b</sup> S. Ishiuchi et al., *J. Phys. Chem. A*, 2007, **111**, 7569.

## Figure Captions

**Figure F1.** Structures and relative energies (in  $\text{cm}^{-1}$ ) of various (20) isomers of  $\text{PhOH-Ar}_2$  in the  $S_0$  state calculated at the M06-2X/aug-cc-pVTZ level. The relative energies are derived from  $D_e$  ( $D_0$ ) values.

**Figure F2.** (a) Experimental  $\Delta S_1$  shifts of various isomers of  $\text{PhOH-Ar}_n$  ( $n \leq 4$ ) with respect to the  $S_1$  origin of bare PhOH ( $n=0$ ) at  $36350 \text{ cm}^{-1}$ . (b)  $\Delta S_1$  shifts calculated for various isomers of  $\text{PhOH-Ar}_n$  ( $n \leq 4$ ) with respect to the  $S_1$  origin of bare PhOH ( $n=0$ ) at  $36349 \text{ cm}^{-1}$  using adiabatic transition energies without ZPE.

**Figure F3.** Structures and relative energies (in  $\text{cm}^{-1}$ ) of various (20) isomers of  $\text{PhOH-Ar}_2$  in the  $D_0$  state calculated at the M06-2X/aug-cc-pVTZ level. The relative energies are derived from  $D_e$  ( $D_0$ ) values.

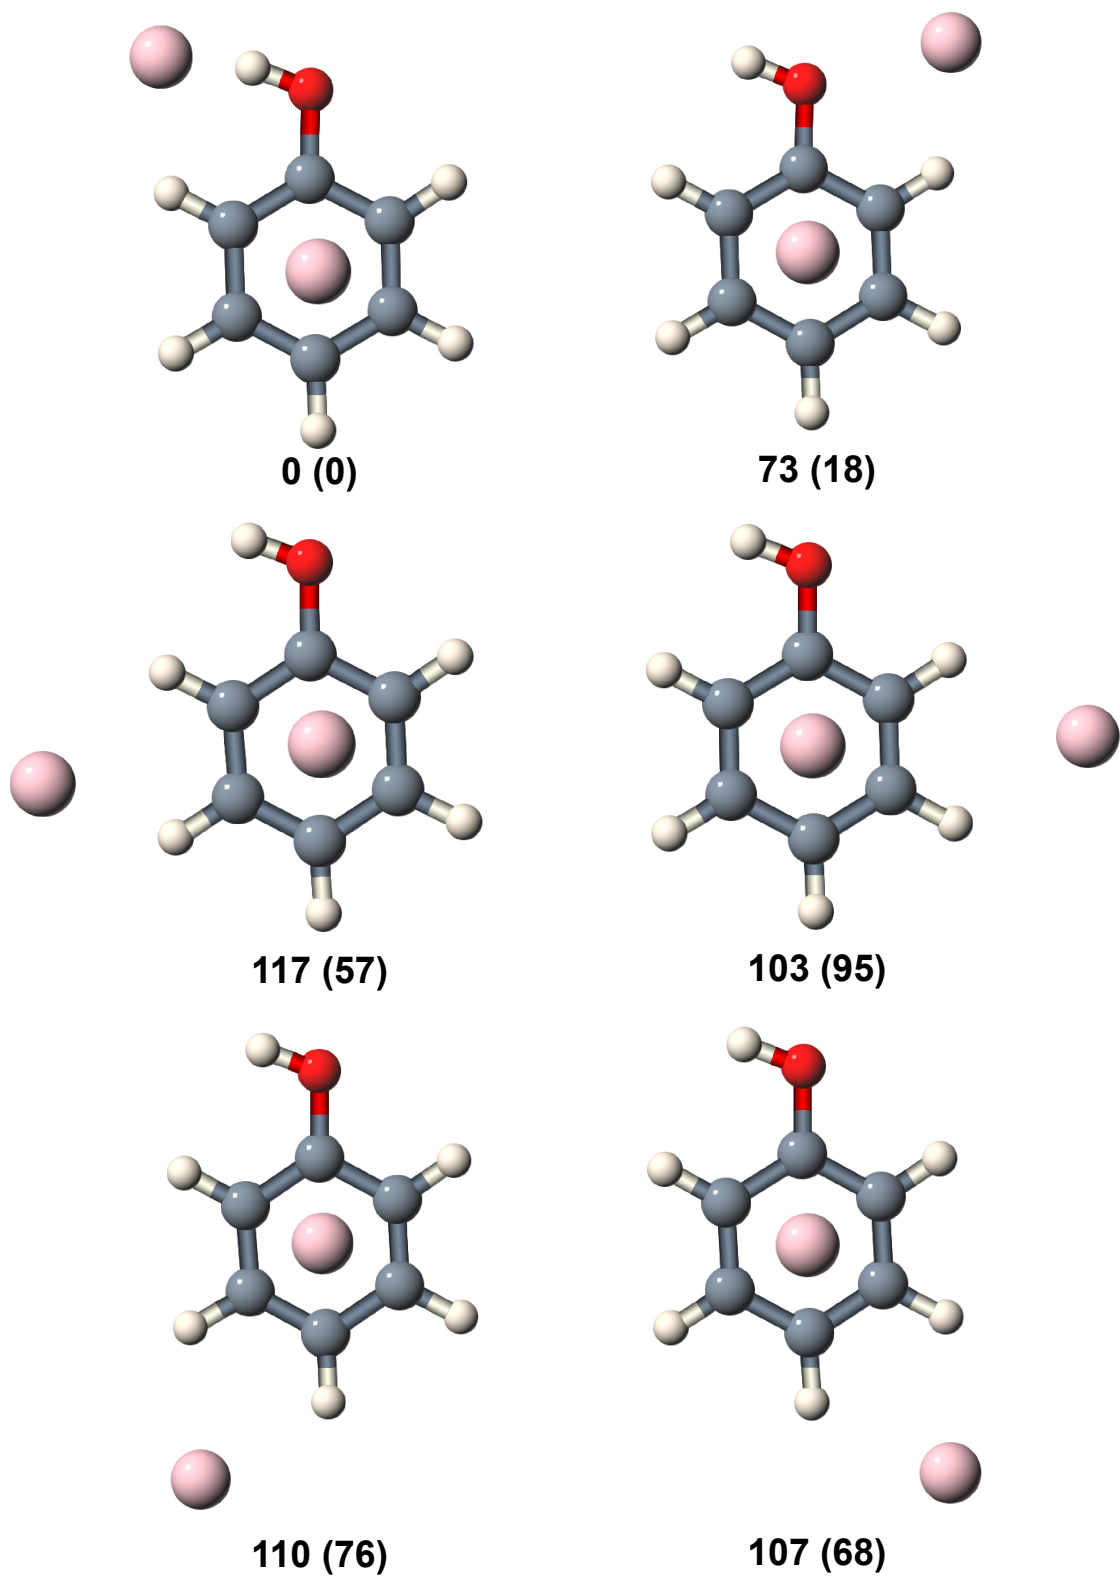

Figure F1

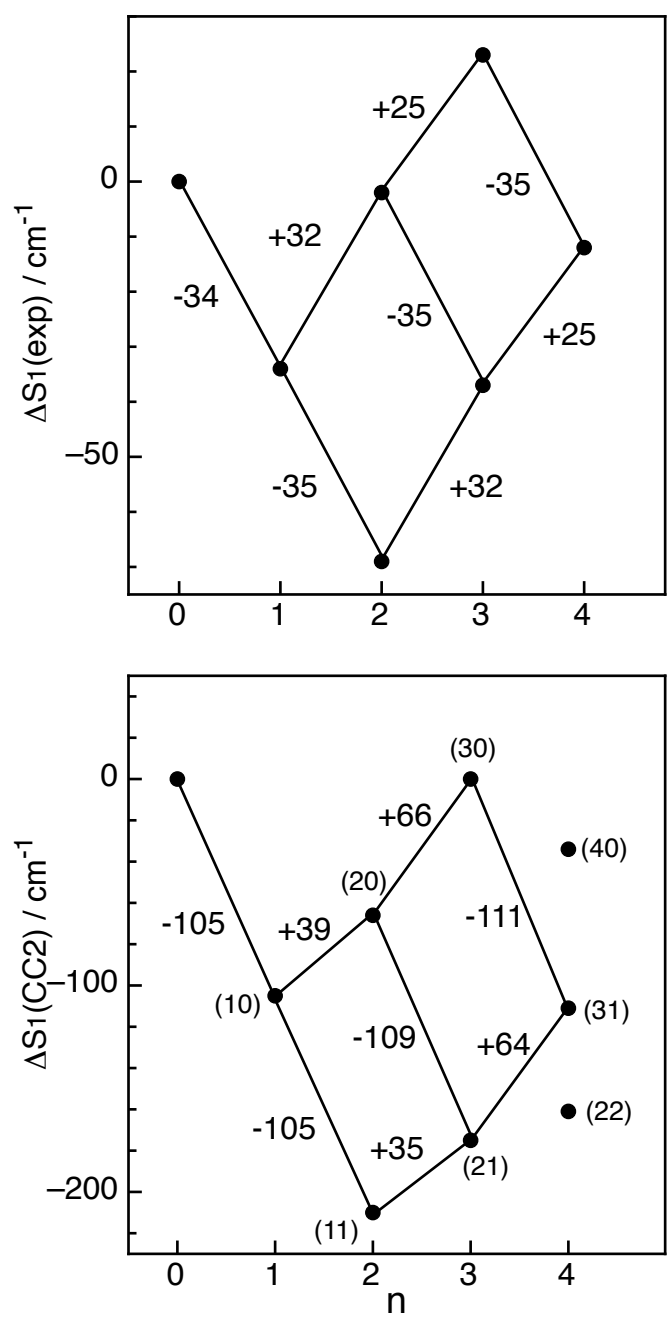

Figure F2

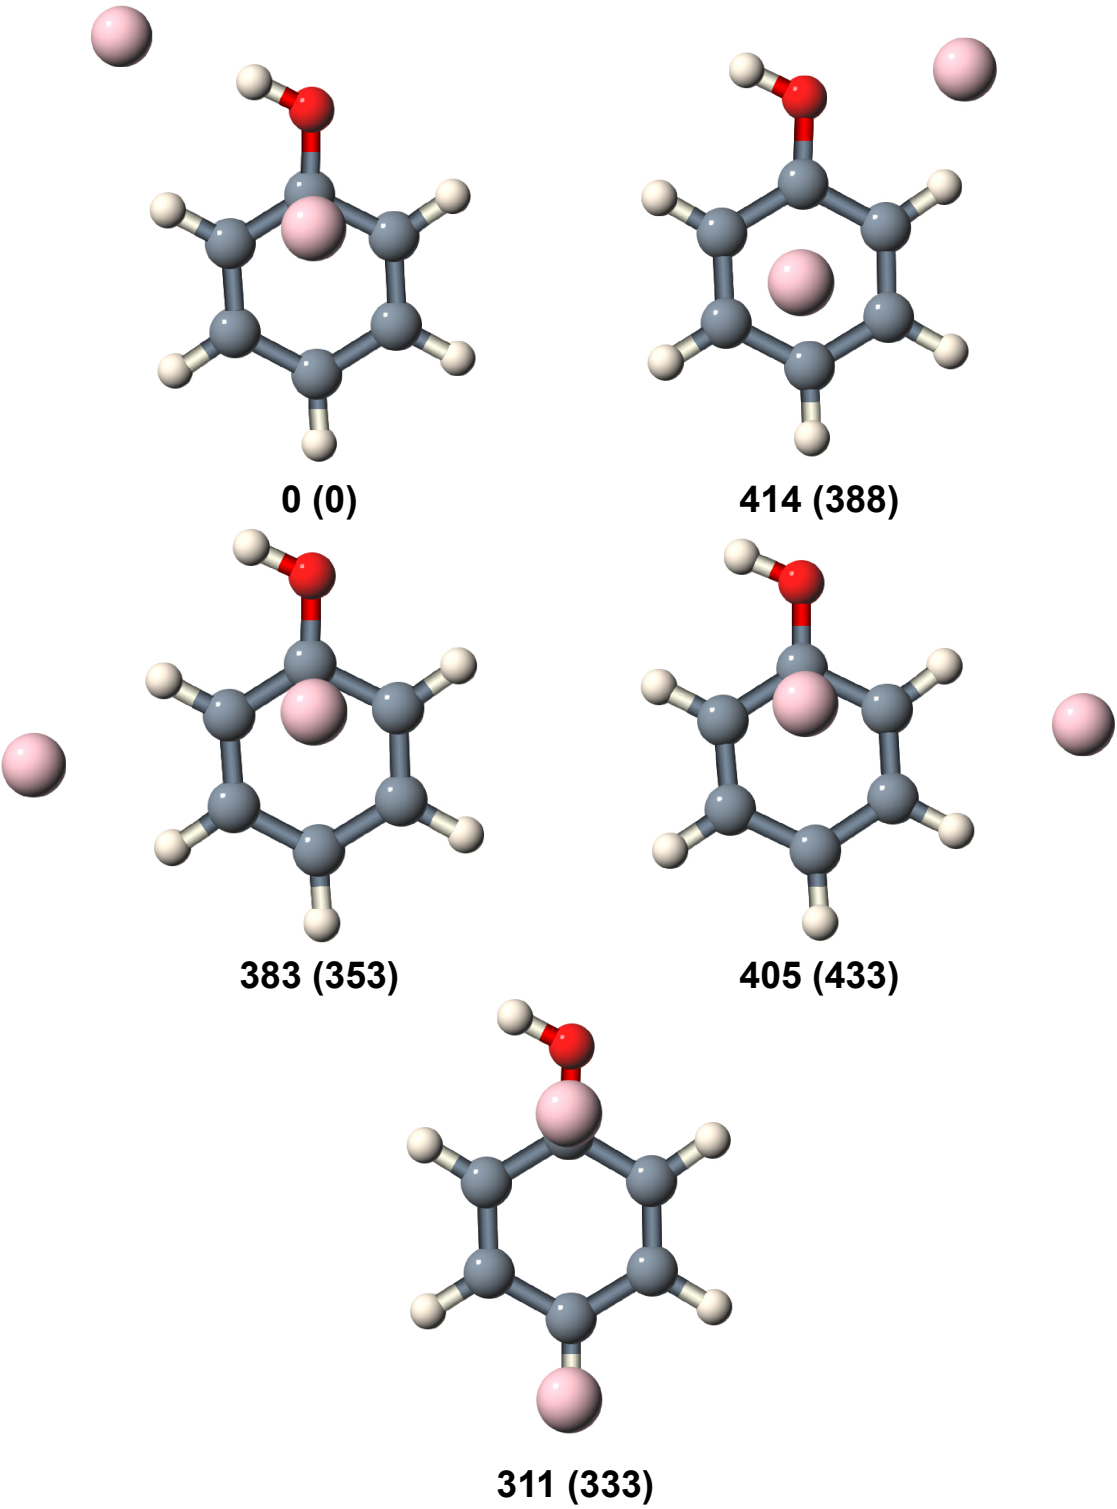

Figure F3
